# Supplementary material for: Present-Day Methane Shortwave Absorption Mutes Surface Warming and Wetting Relative to Preindustrial Conditions
Source: Copernicus journal article supplement (doi:10.5194/egusphere-2024-872), 2024-04-10
Supplement: Supplementary file 1 [file egusphere-2024-872-supplement.pdf]

## Supplementary Figures

### Present-Day Methane Shortwave Absorption Mutes Surface Warming and Wetting Relative to Preindustrial Conditions

Robert J. Allen<sup>1</sup>, Xueying Zhao<sup>1,2,3</sup>, Cynthia A. Randles<sup>4\*</sup>, Ryan J. Kramer<sup>5</sup>, Bjørn H. Samset<sup>6</sup> and Christopher J. Smith<sup>7,8</sup>

<sup>1</sup>Department of Earth and Planetary Sciences, University of California, Riverside, CA, USA.

<sup>2</sup>National Center for Atmospheric Research, Boulder, CO.

<sup>3</sup>Department of Earth and Planetary Science, The University of Texas at Austin, Austin, TX, USA.

<sup>4</sup>ExxonMobil Technology and Engineering Company, Annandale, NJ, USA  
\*now at UNEP International Methane Emission Observatory, Paris, France.

<sup>5</sup>NOAA Geophysical Fluid Dynamics Laboratory, Princeton, NJ.

<sup>6</sup>CICERO Center for International Climate and Environmental Research in Oslo, Oslo, Norway.

<sup>7</sup>School of Earth and Environment, University of Leeds, Leeds, UK.

<sup>8</sup>International Institute for Applied Systems Analysis (IIASA), Laxenburg, Austria.

*Correspondence to:* Robert J. Allen ([rjallen@ucr.edu](mailto:rjallen@ucr.edu))

#### **Contents of this file:**

Supplementary Figures 1-5

## CH<sub>4SW</sub> and CO<sub>2SW</sub> Spatial Response Correlations At Pressure Levels

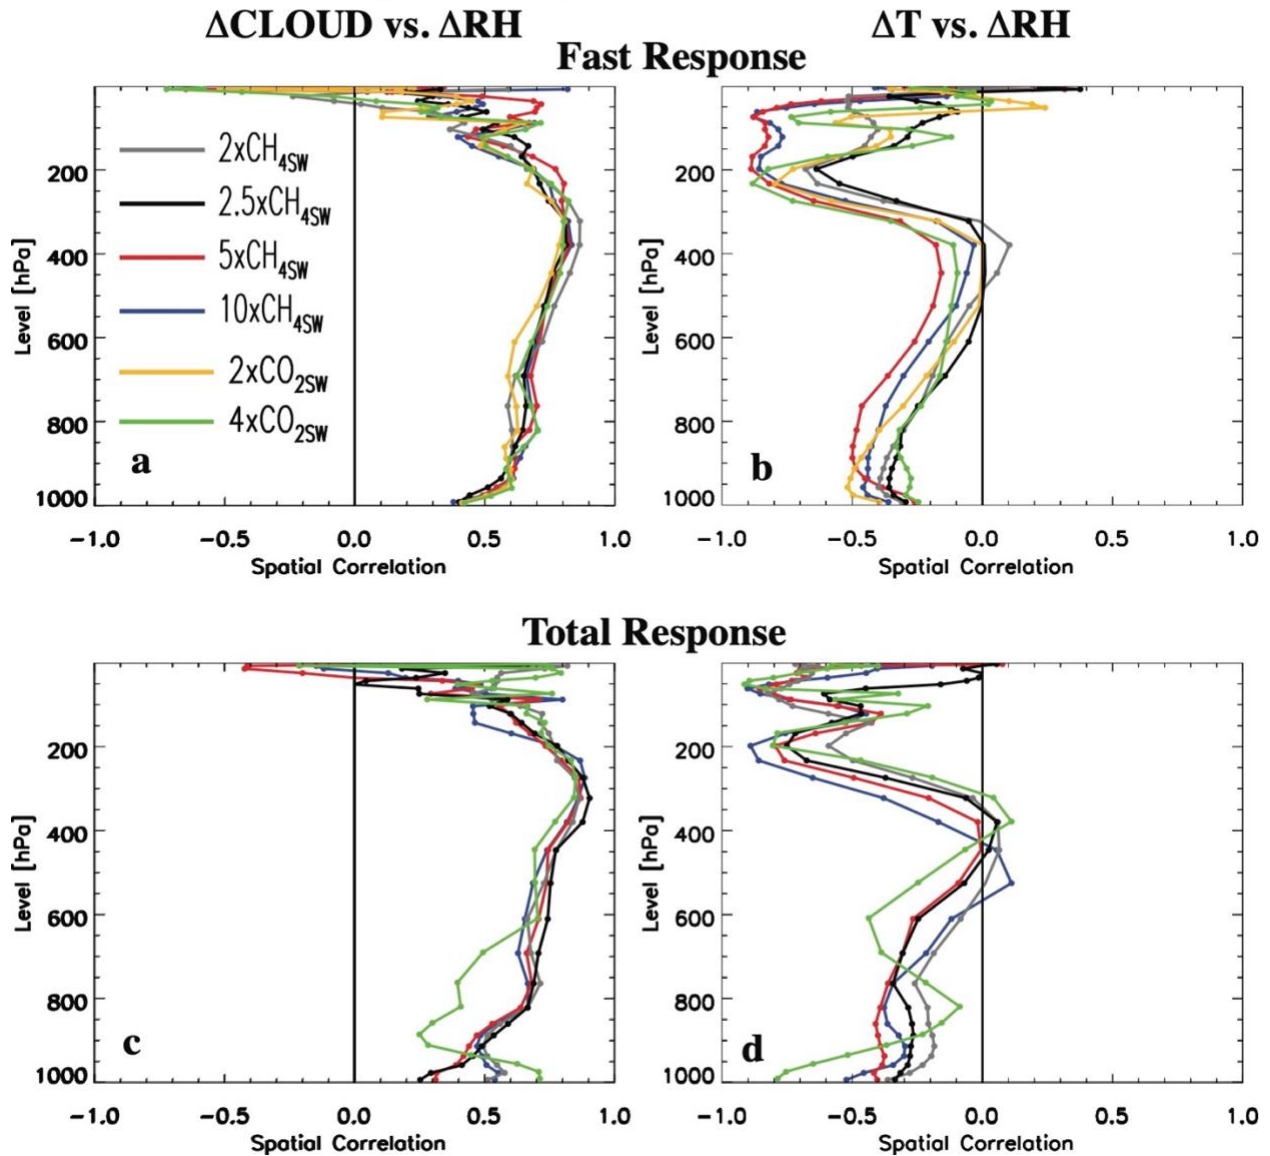

**Supplementary Figure 1. CH<sub>4SW</sub> and CO<sub>2SW</sub> spatial response correlations at each pressure level.** Annual mean spatial correlations at each pressure level for (a, c)  $\Delta$ CLOUD versus  $\Delta$ RH; and (b, d)  $\Delta$ T versus  $\Delta$ RH for (a-b) the fast response and (c-d) the total response for 2xCH<sub>4SW</sub> (gray); 2.5xCH<sub>4SW</sub> (black); 5xCH<sub>4SW</sub> (red); 10xCH<sub>4SW</sub> (blue); 2xCO<sub>2SW</sub> (gold); and 4xCO<sub>2SW</sub> (green). A significant correlation at the 90% confidence level, based on a standard t-test, is denoted by solid dots. Climatologically fixed SST simulations are used to estimate the fast responses. Total climate responses are estimated using from coupled ocean-atmosphere CESM2 simulations. 2xCO<sub>2</sub> coupled simulations were not performed (i.e., no gold line in panels c-d).

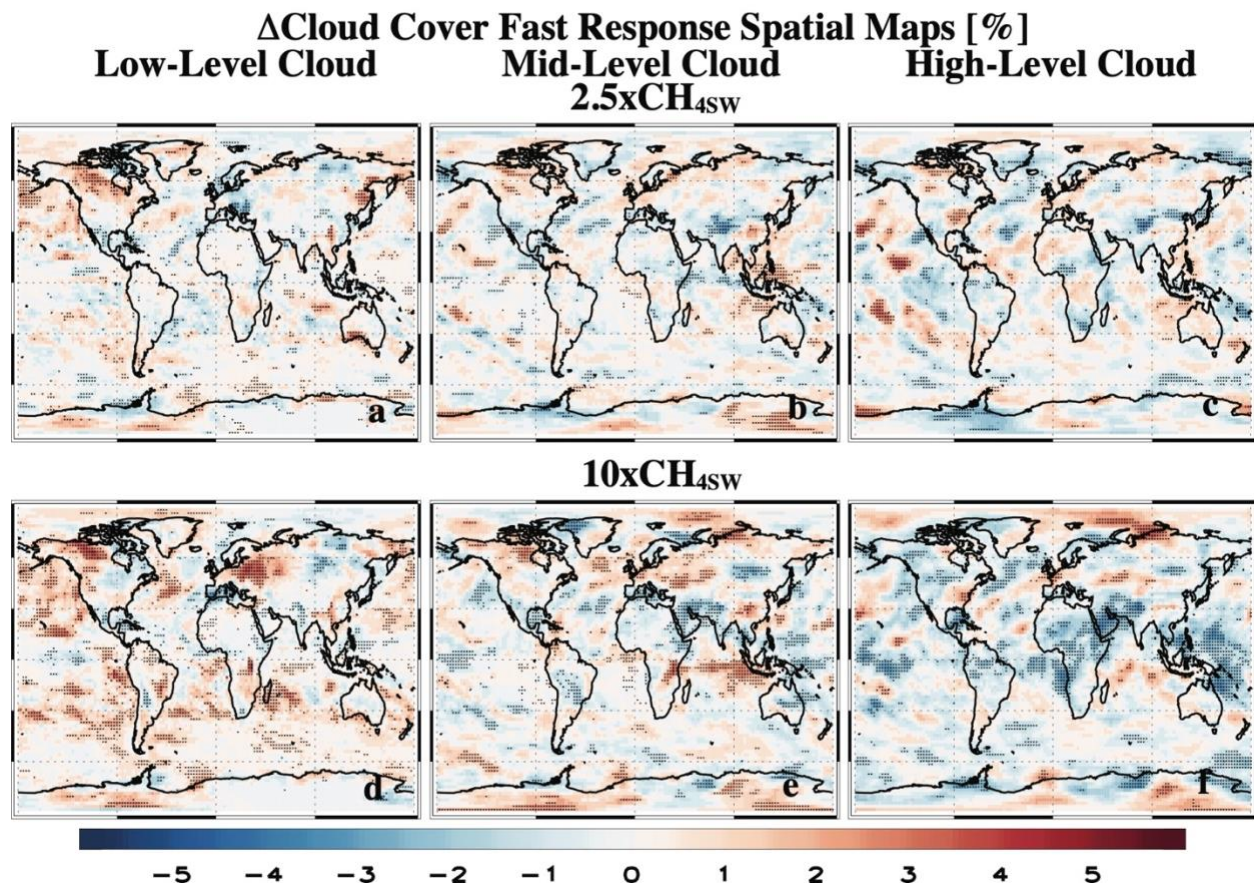

**Supplementary Figure 2. Spatial cloud cover fast responses under 2.5xCH<sub>4sw</sub> and 10xCH<sub>4sw</sub>.** Annual mean global mean spatial fast responses of (a, c) low-cloud cover; (b, e) mid-level cloud cover; and (c, f) high-level cloud cover under (a-c) 2.5xCH<sub>4sw</sub> and (d-f) 10xCH<sub>4sw</sub>. A significant response at the 90% confidence level, based on a standard t-test, is denoted by solid dots. Fast responses are estimated from the fixed climatological sea surface temperature simulations. Units are %.



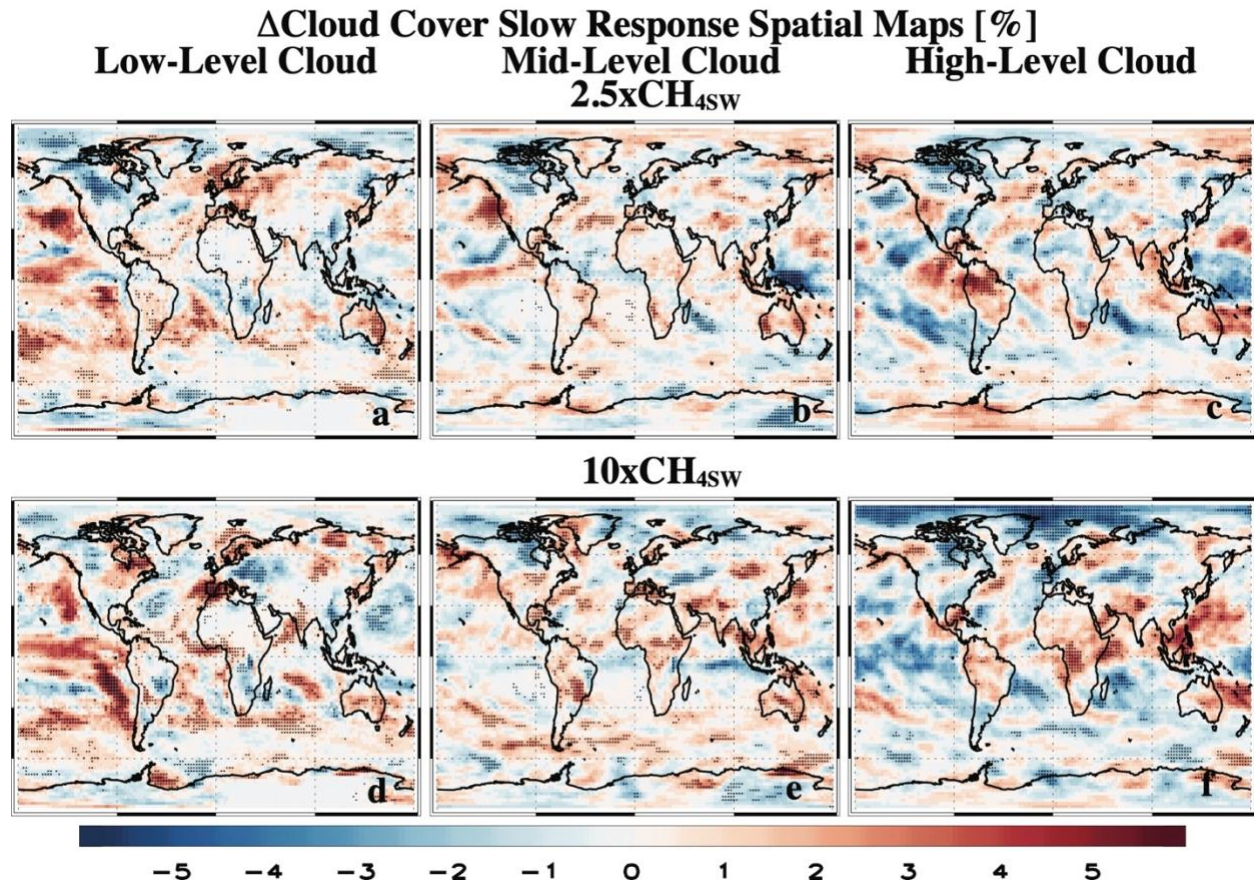

**Supplementary Figure 3. Spatial cloud cover slow responses under 2.5xCH<sub>4sw</sub> and 10xCH<sub>4sw</sub>.** Annual mean global mean spatial slow responses of (a, c) low-cloud cover; (b, e) mid-level cloud cover; and (c, f) high-level cloud cover under (a-c) 2.5xCH<sub>4sw</sub> and (d-f) 10xCH<sub>4sw</sub>. A significant response at the 90% confidence level, based on a standard t-test, is denoted by solid dots. Slow responses are estimated as the difference of the total response minus the fast response. Units are %.

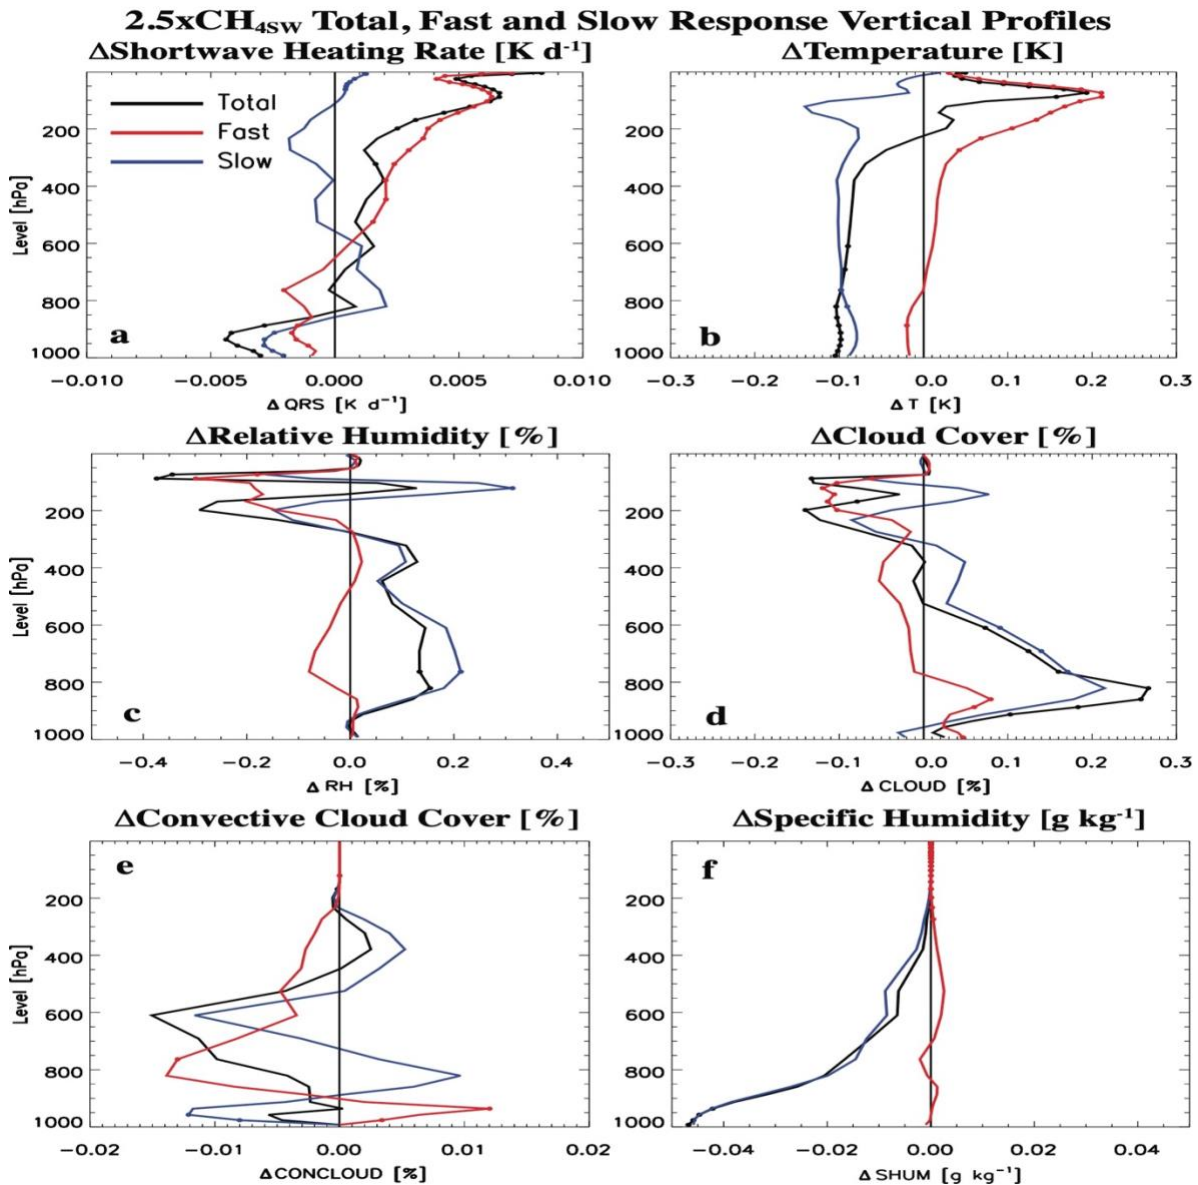

**Supplementary Figure 4. 2.5xCH<sub>4sw</sub> total, fast and slow vertical profile responses.** 2.5xCH<sub>4sw</sub> annual mean global mean vertical response profiles of (a) shortwave heating rate (QRS; units are K d<sup>-1</sup>); (b) air temperature (T; units are K); and (c) relative humidity (RH; units are %); (d) cloud cover (CLOUD; units are %); (e) convective cloud cover (CONCLOUD; units are %); and (f) specific humidity (SHUM; units are g kg<sup>-1</sup>) for the total (black); fast (red) and slow (blue) response. A significant response at the 90% confidence level, based on a standard t-test, is denoted by solid dots. Climatologically fixed SST simulations are used to estimate the fast responses. Total climate responses are estimated using from coupled ocean-atmosphere CESM2 simulations. The slow response is estimated as the difference of the total response minus the fast response.

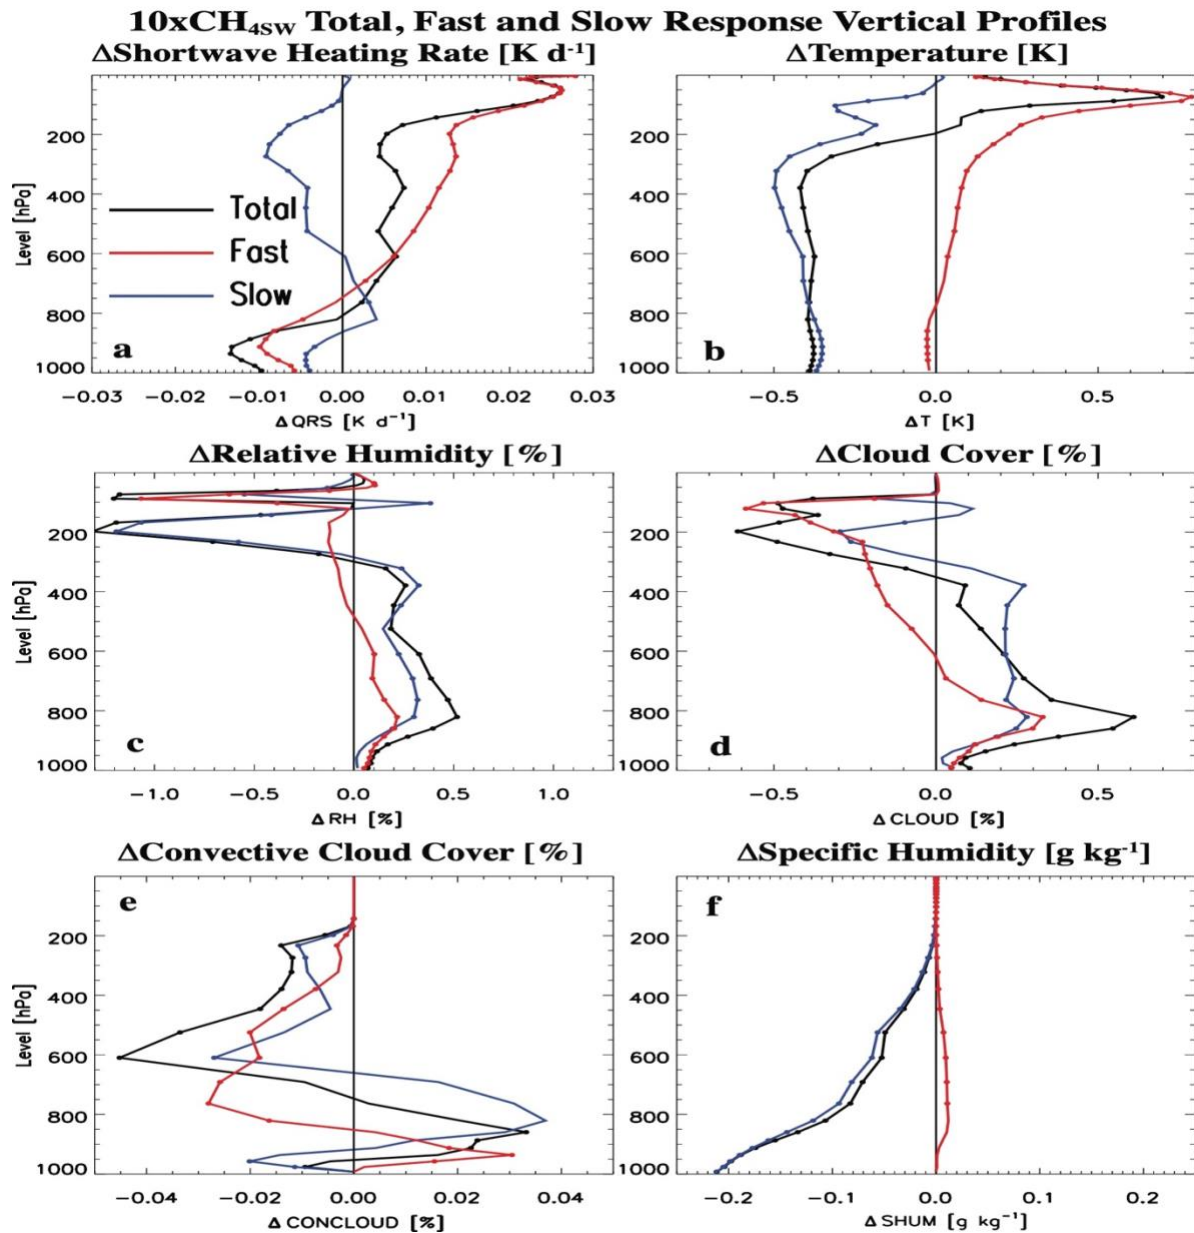

**Supplementary Figure 5. 10xCH<sub>4SW</sub> total, fast and slow vertical profile responses.** 10xCH<sub>4SW</sub> annual mean global mean vertical response profiles of (a) shortwave heating rate (QRS; units are K d<sup>-1</sup>); (b) air temperature (T; units are K); and (c) relative humidity (RH; units are %); (d) cloud cover (CLOUD; units are %); (e) convective cloud cover (CONCLOUD; units are %); and (f) specific humidity (SHUM; units are g kg<sup>-1</sup>) for the total (black); fast (red) and slow (blue) response. A significant response at the 90% confidence level, based on a standard t-test, is denoted by solid dots. Climatologically fixed SST simulations are used to estimate the fast responses. Total climate responses are estimated using from coupled ocean-atmosphere CESM2 simulations. The slow response is estimated as the difference of the total response minus the fast response.
